# Supplementary figures and images for: A biosensor of protein foldedness identifies increased “holdase” activity of chaperones in the nucleus following increased cytosolic protein aggregation
Source: PubMed Central journal article supplement — J Biol Chem. 2022 Jun 17;298(8):102158. doi: 10.1016/j.jbc.2022.102158 (PMC9283929; doi:10.1016/j.jbc.2022.102158), 2022-06-17

**Replicate 1**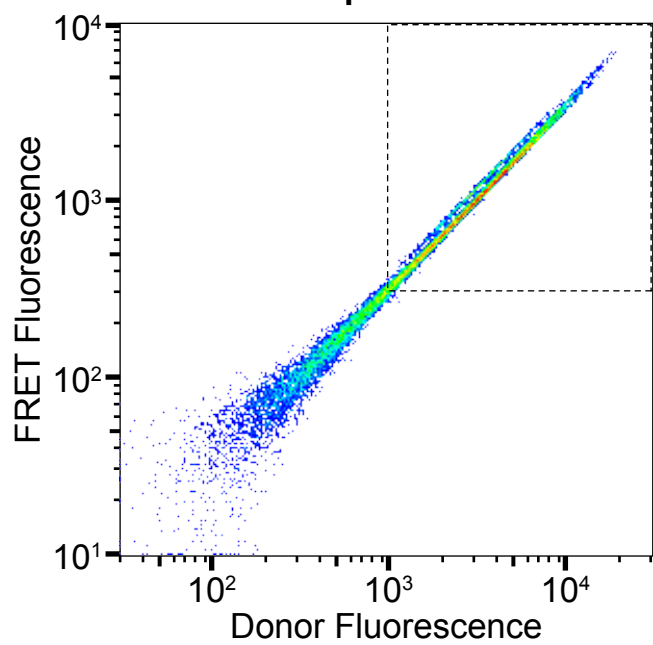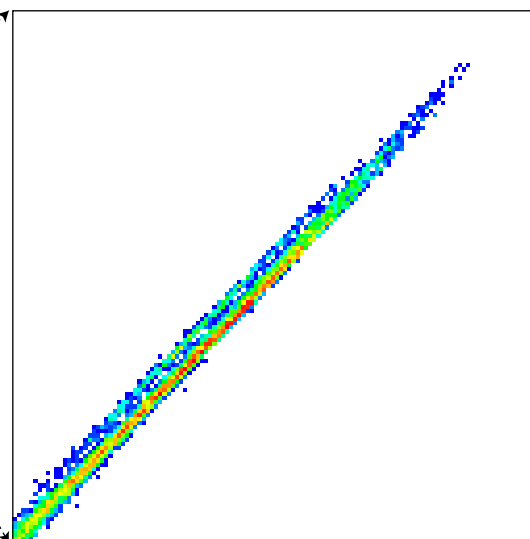**Replicate 2**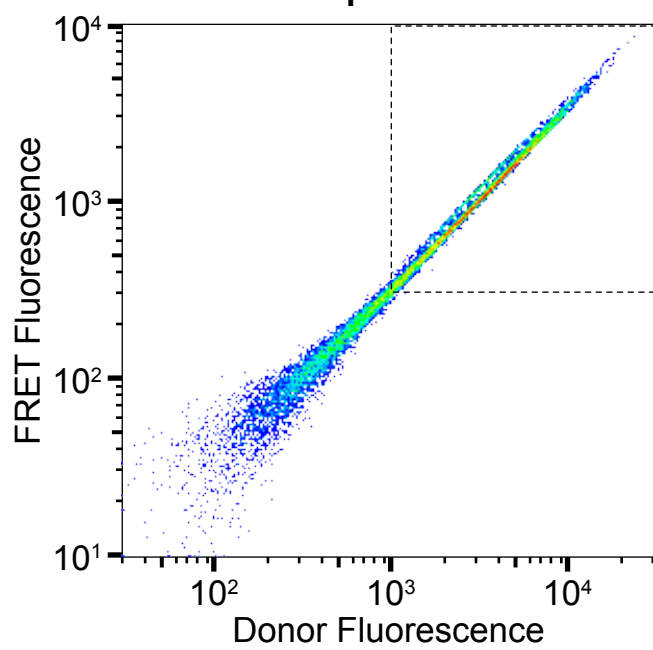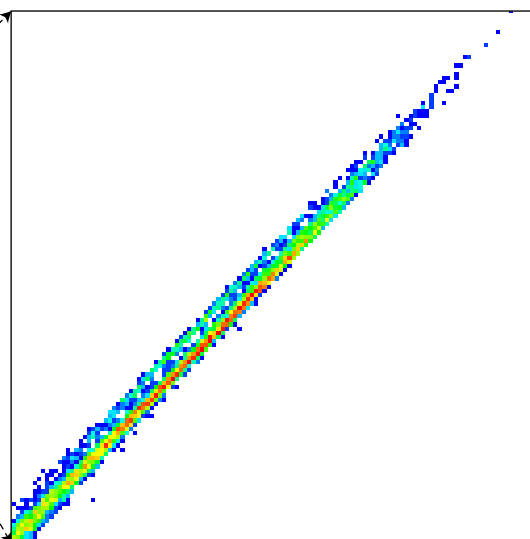**Replicate 3**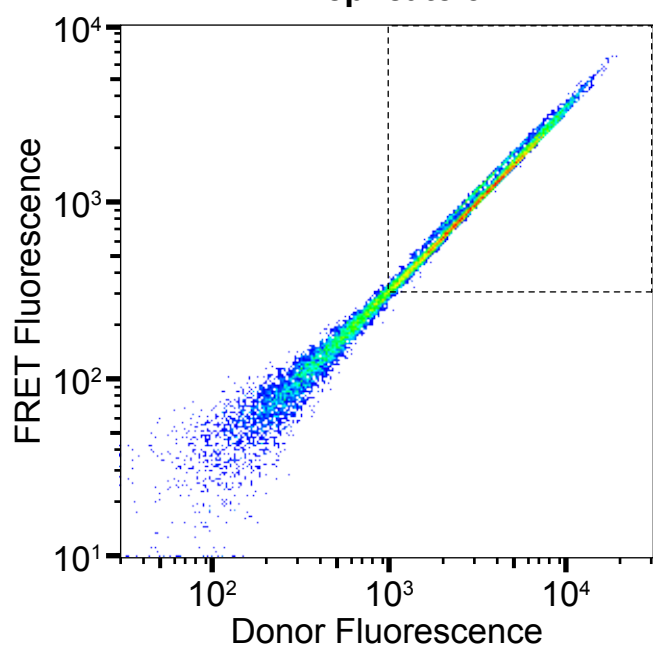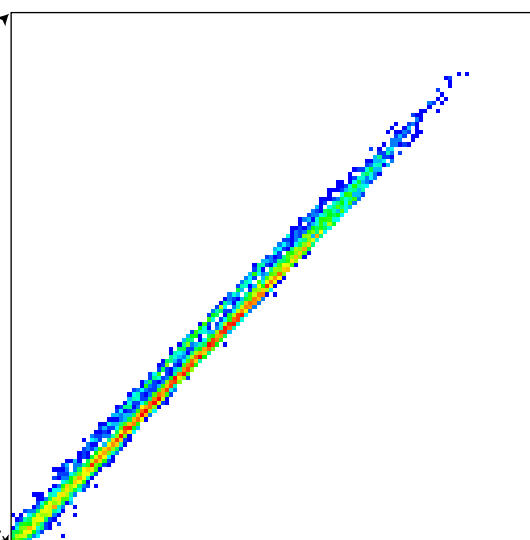

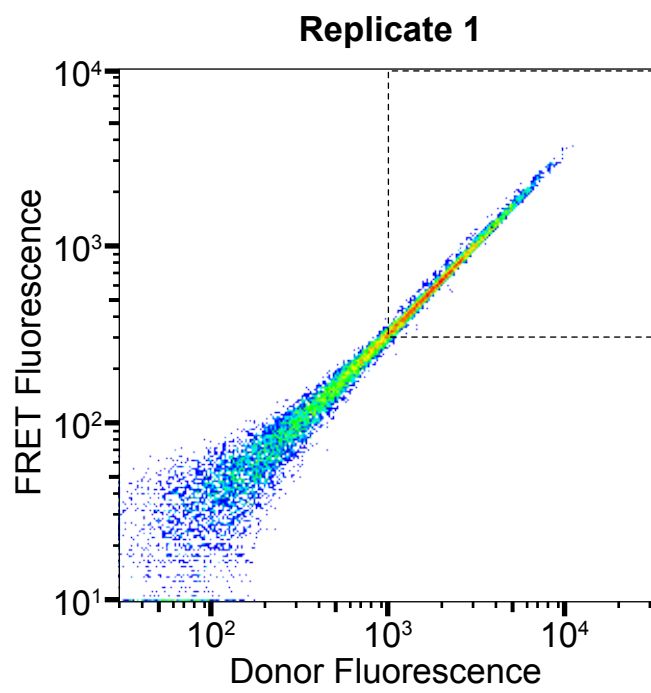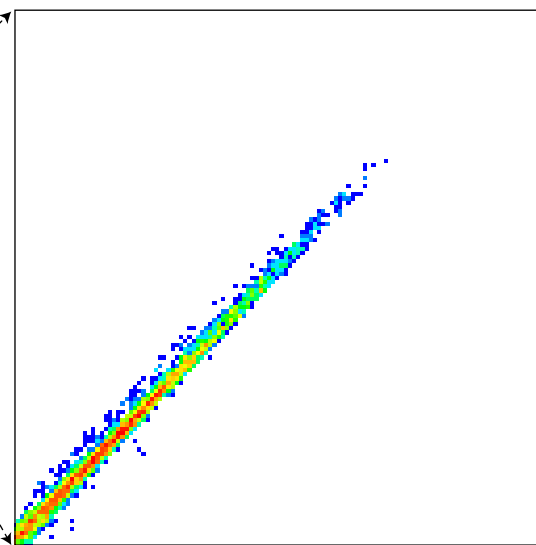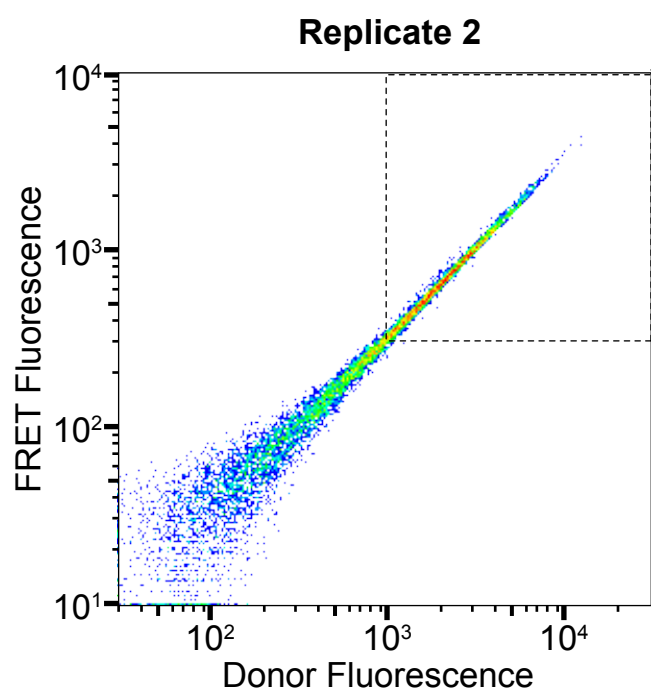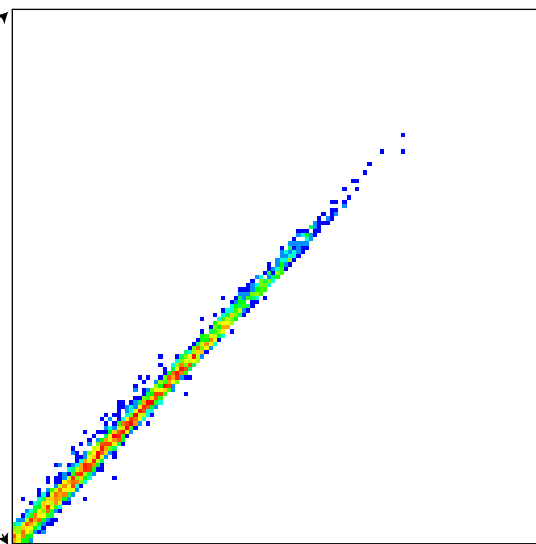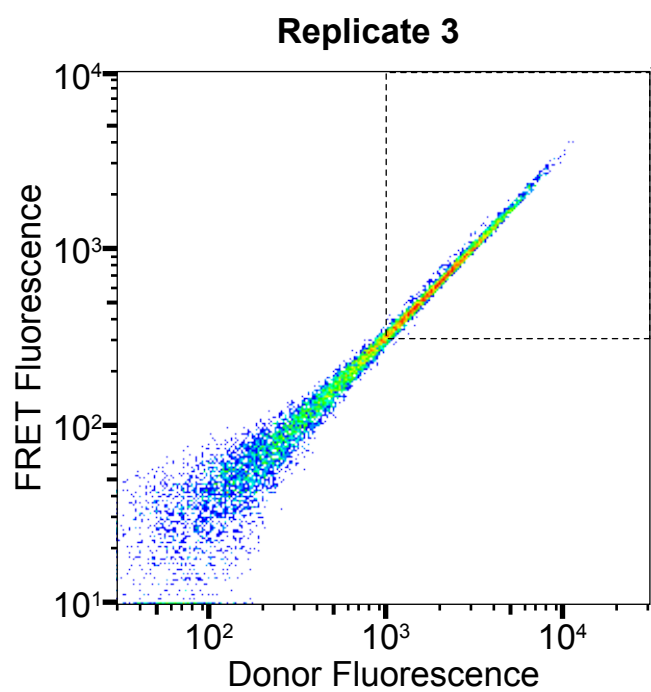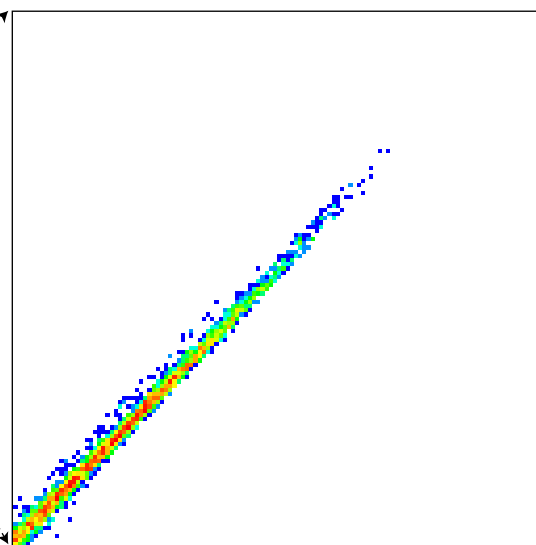

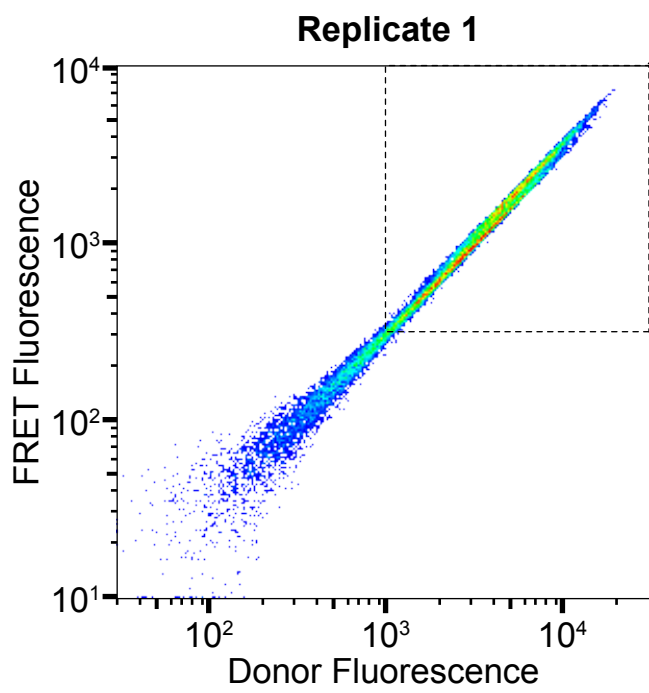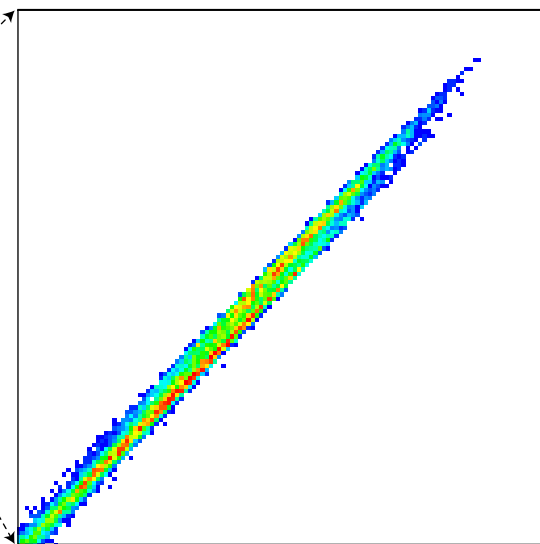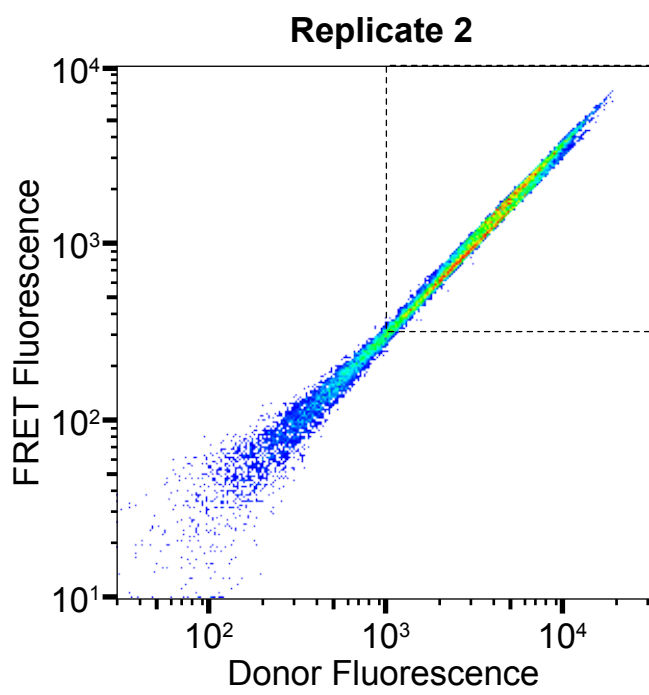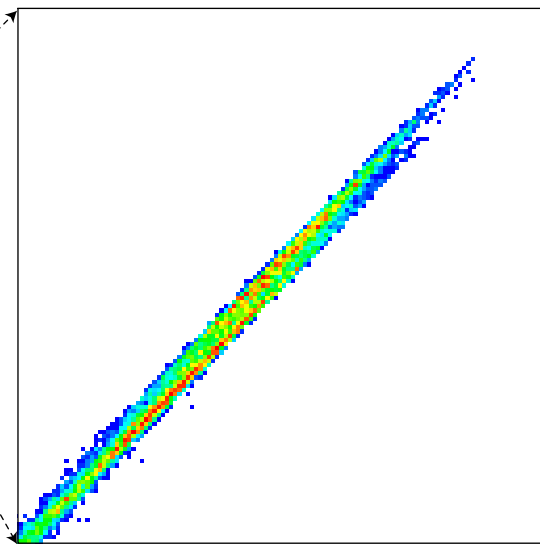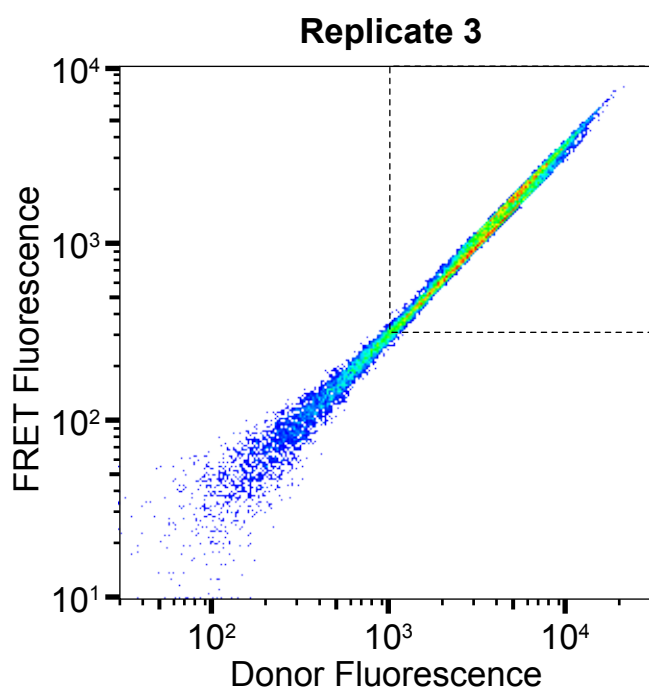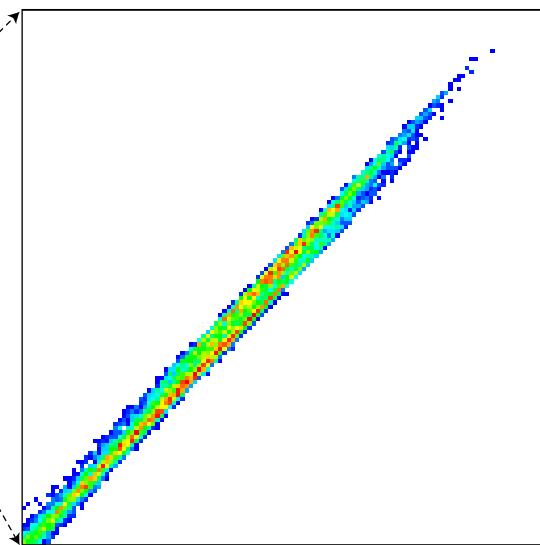

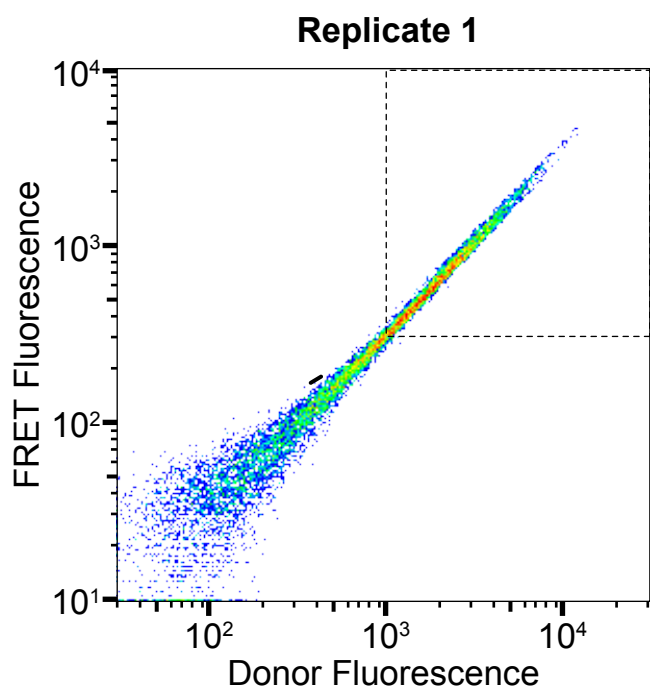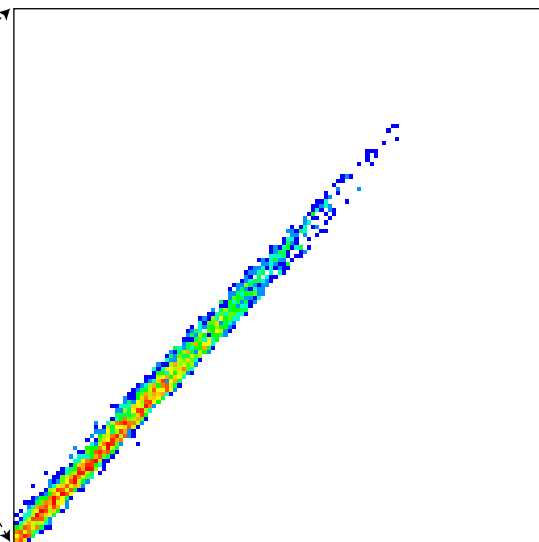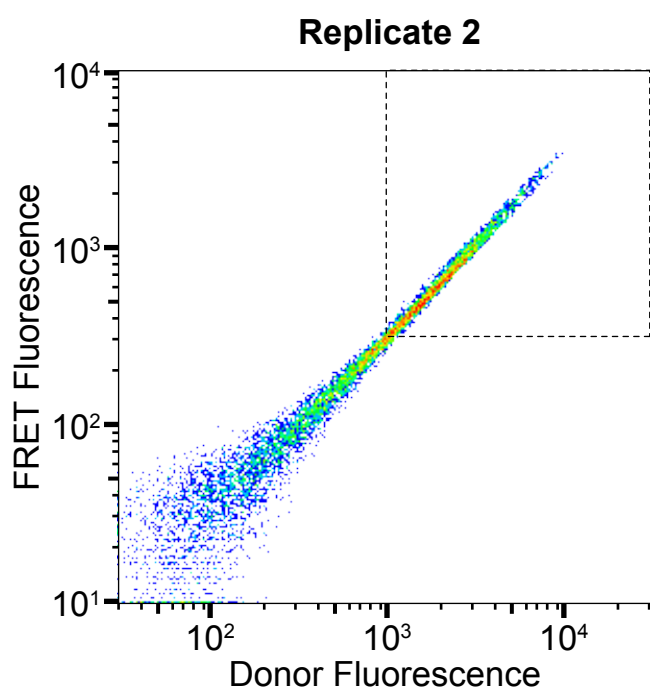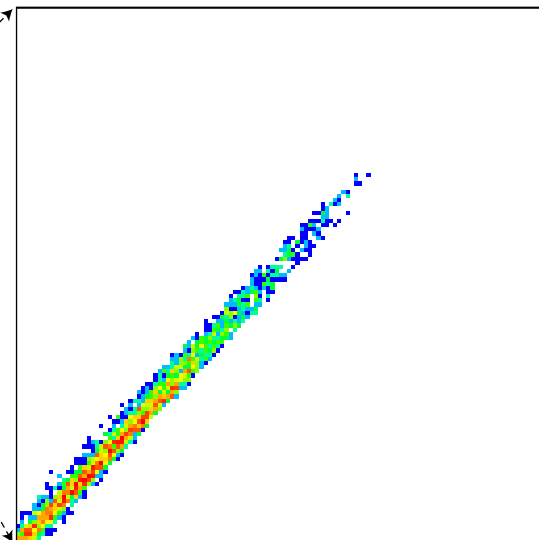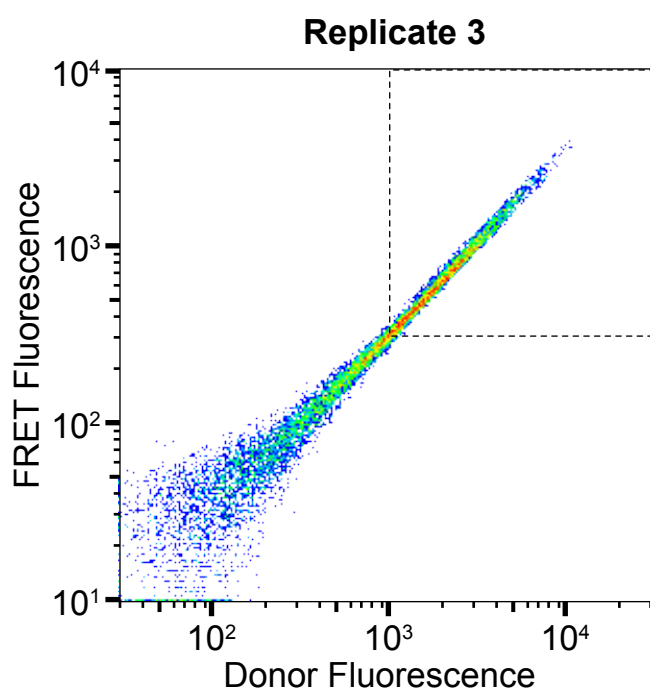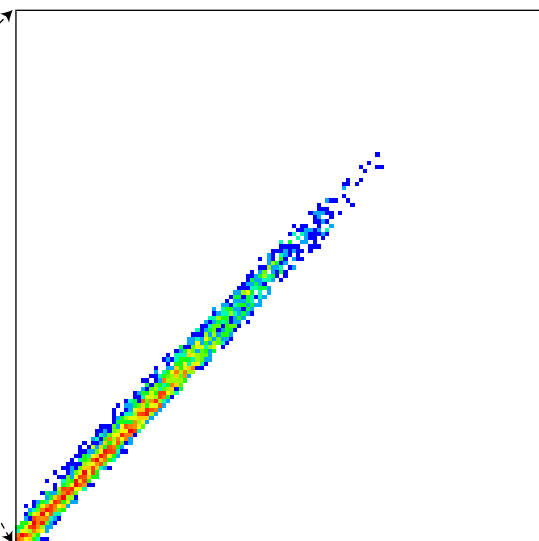

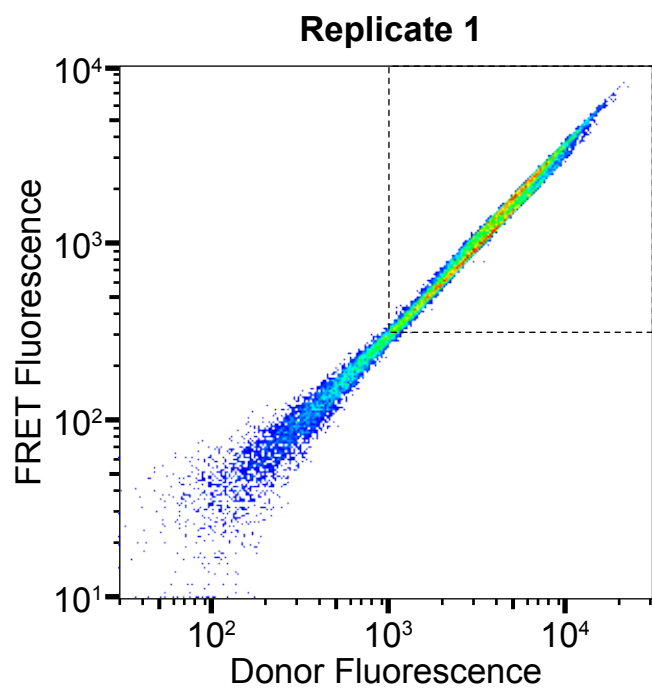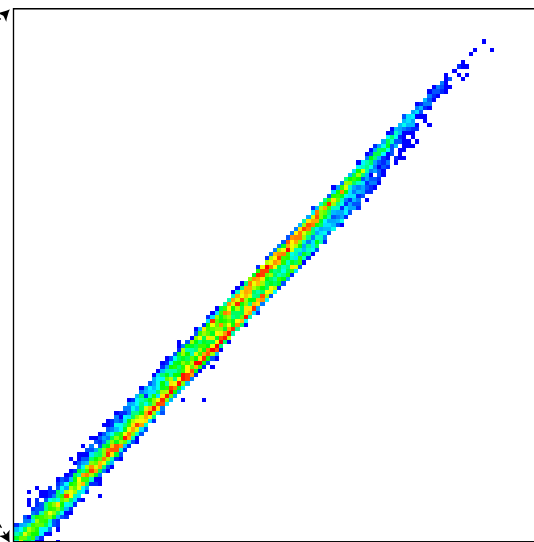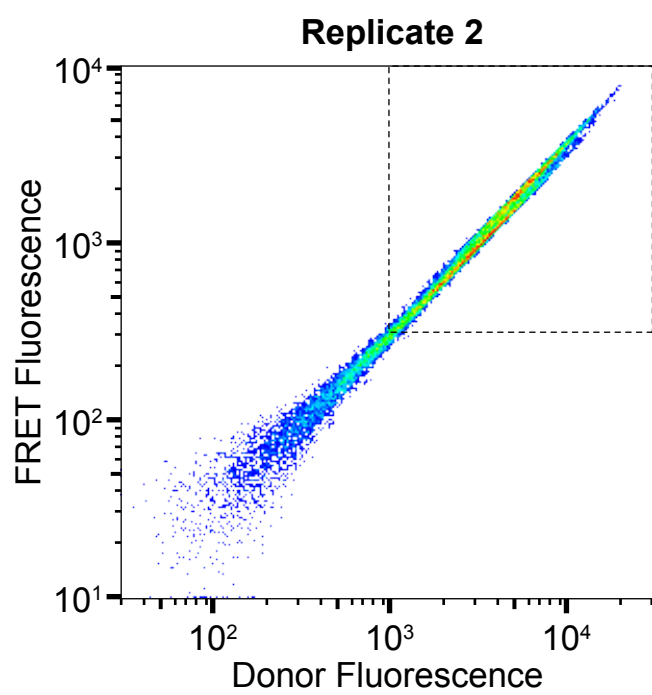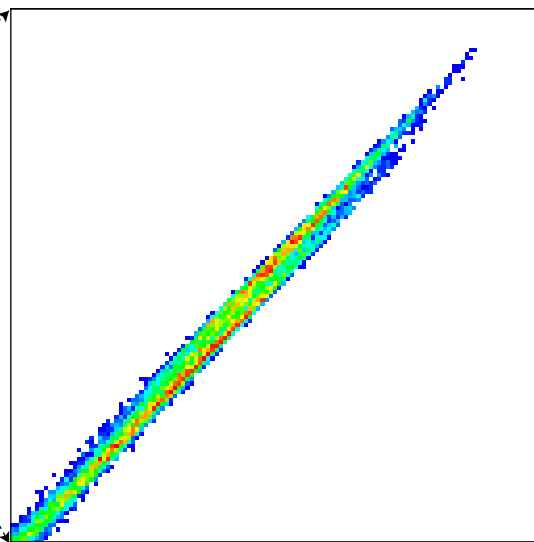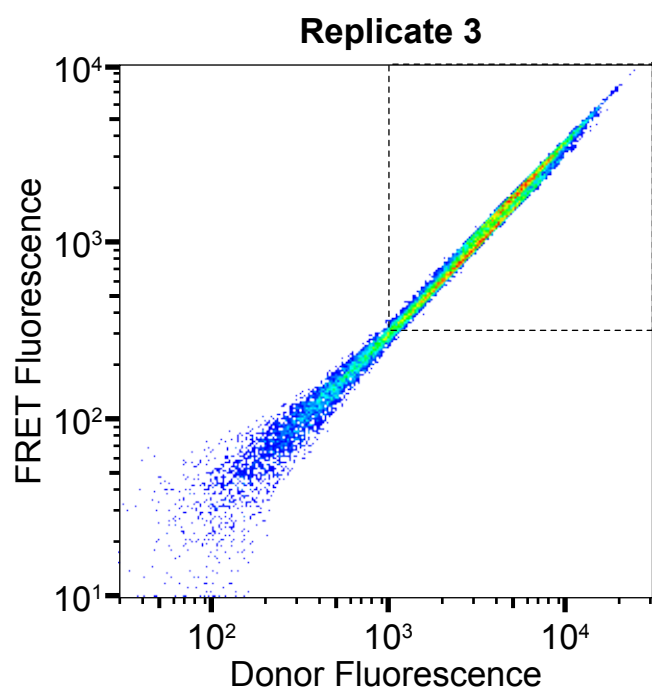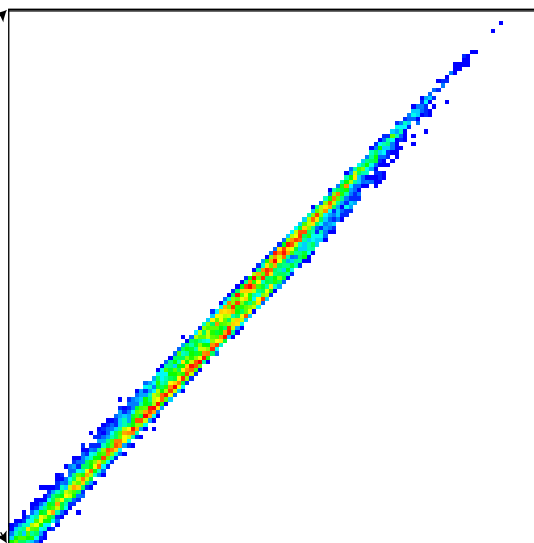

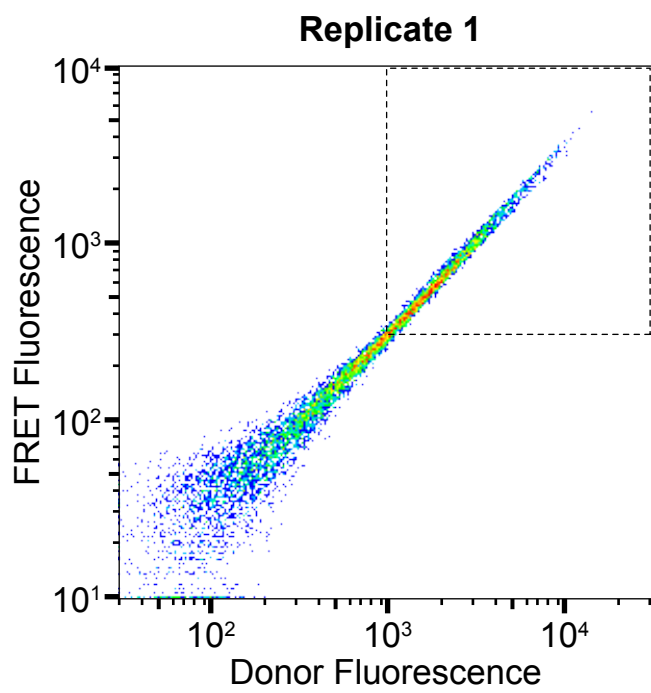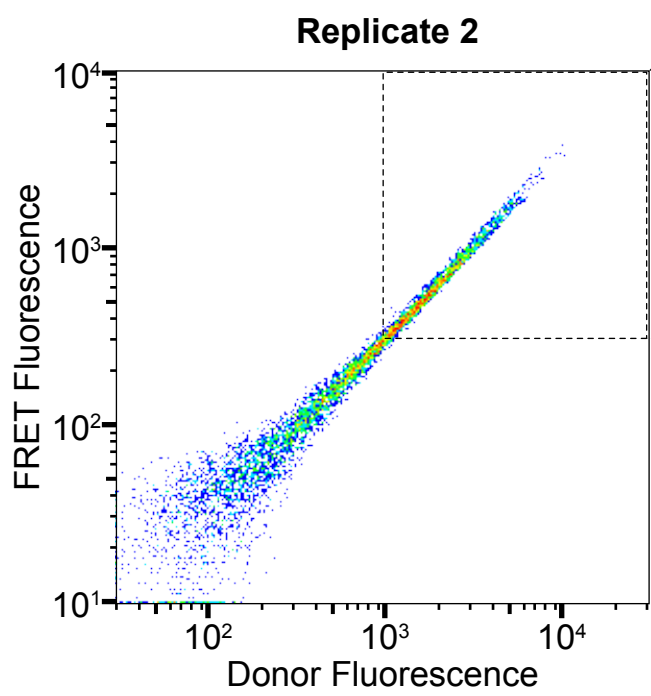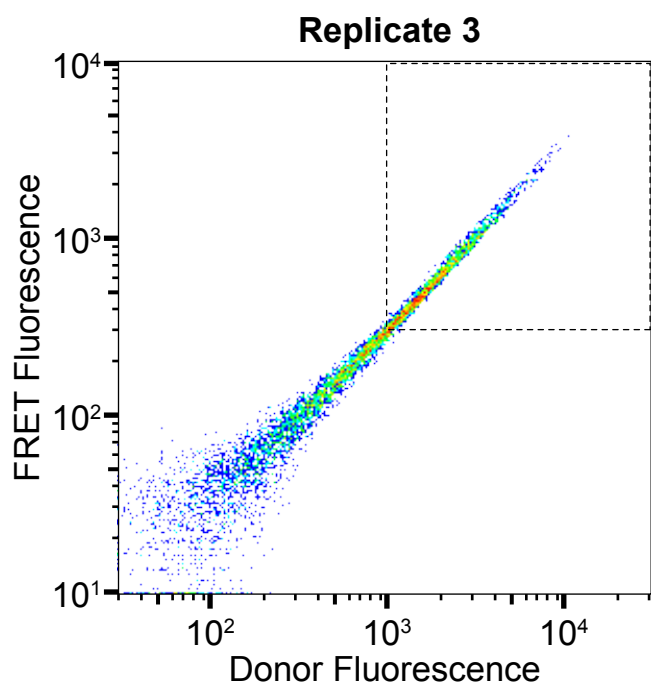

**Replicate 1**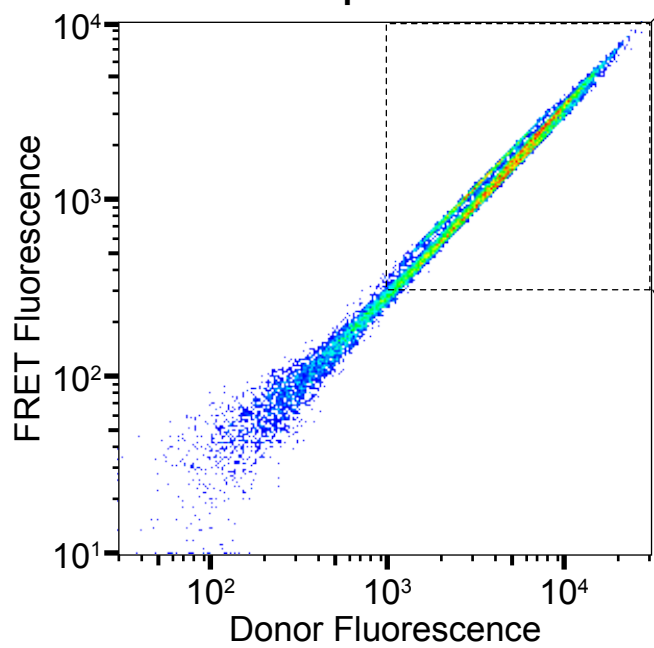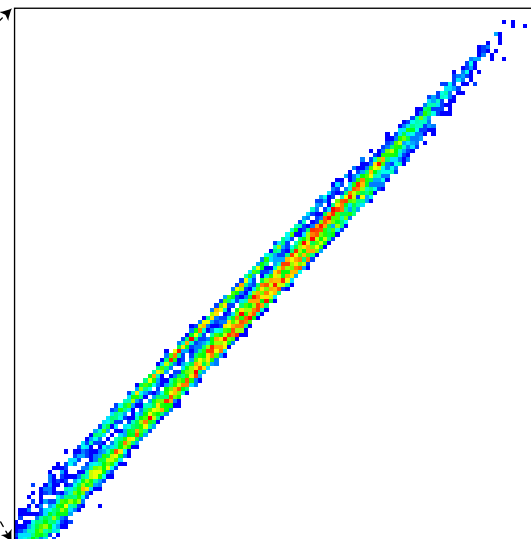**Replicate 2**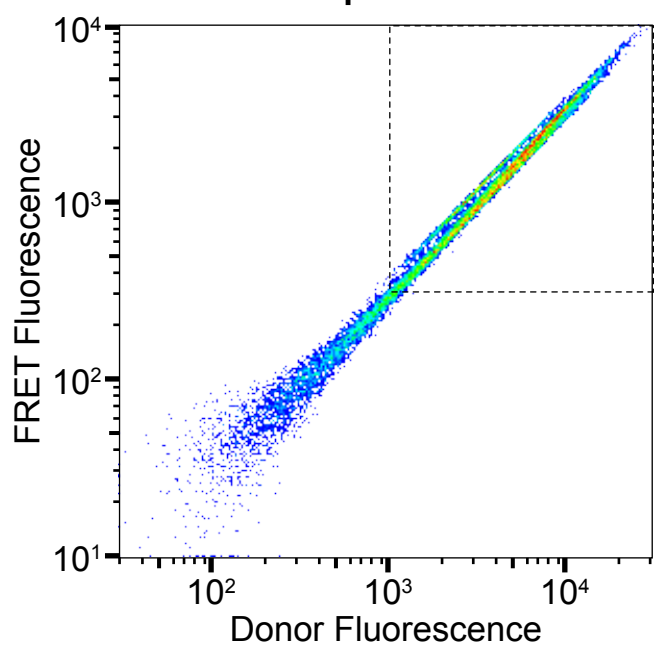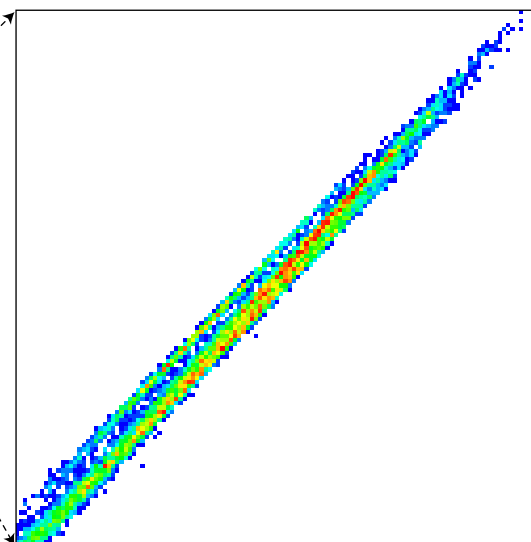**Replicate 3**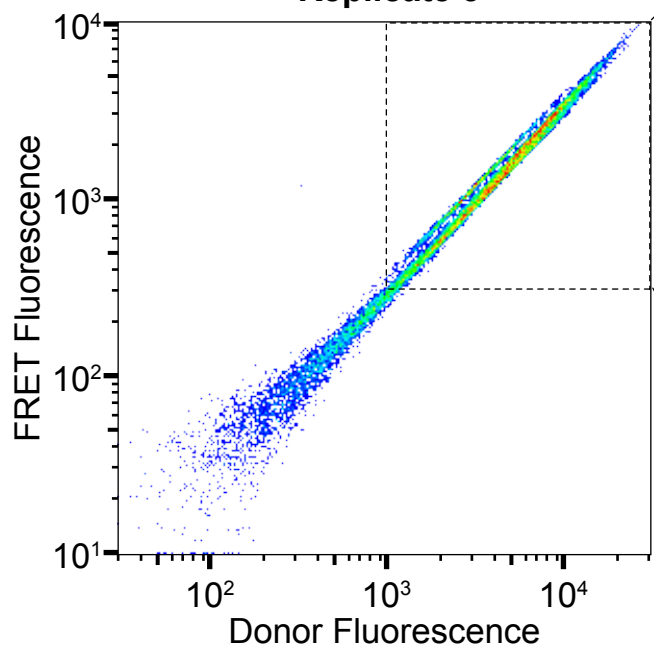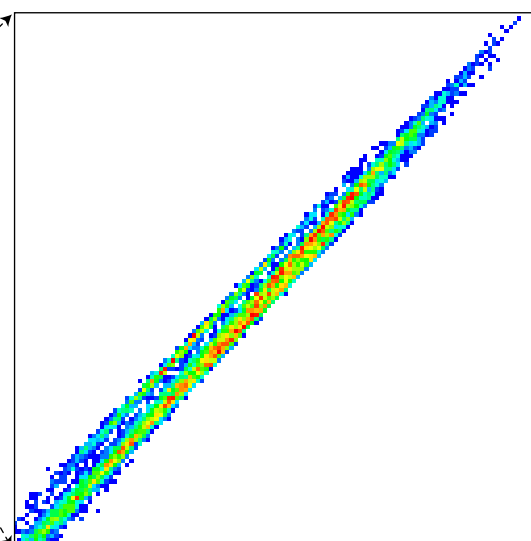

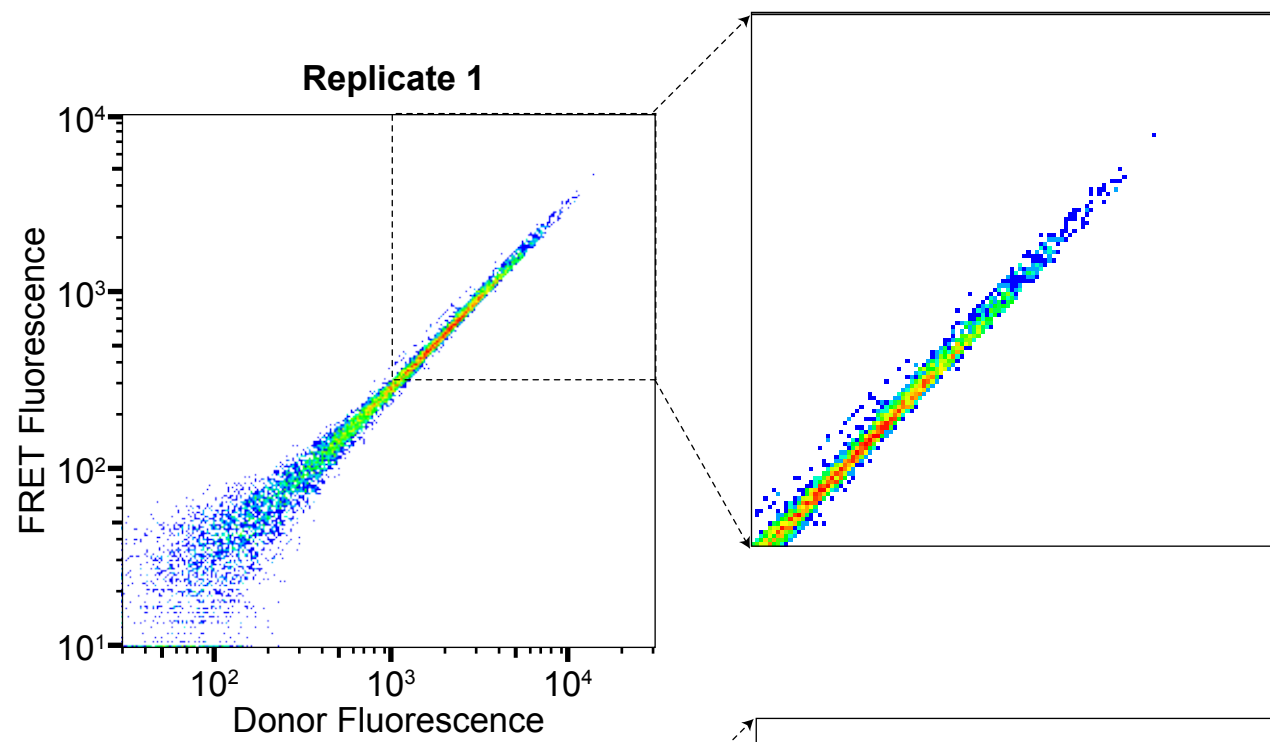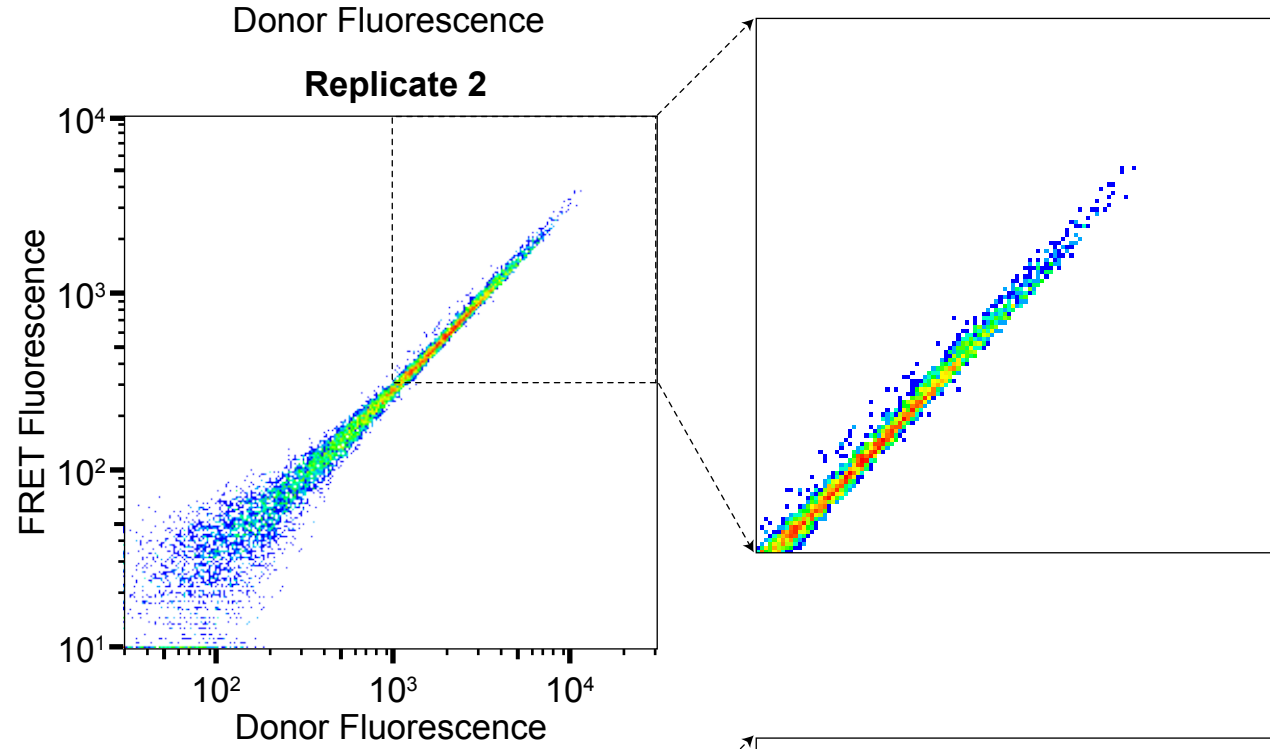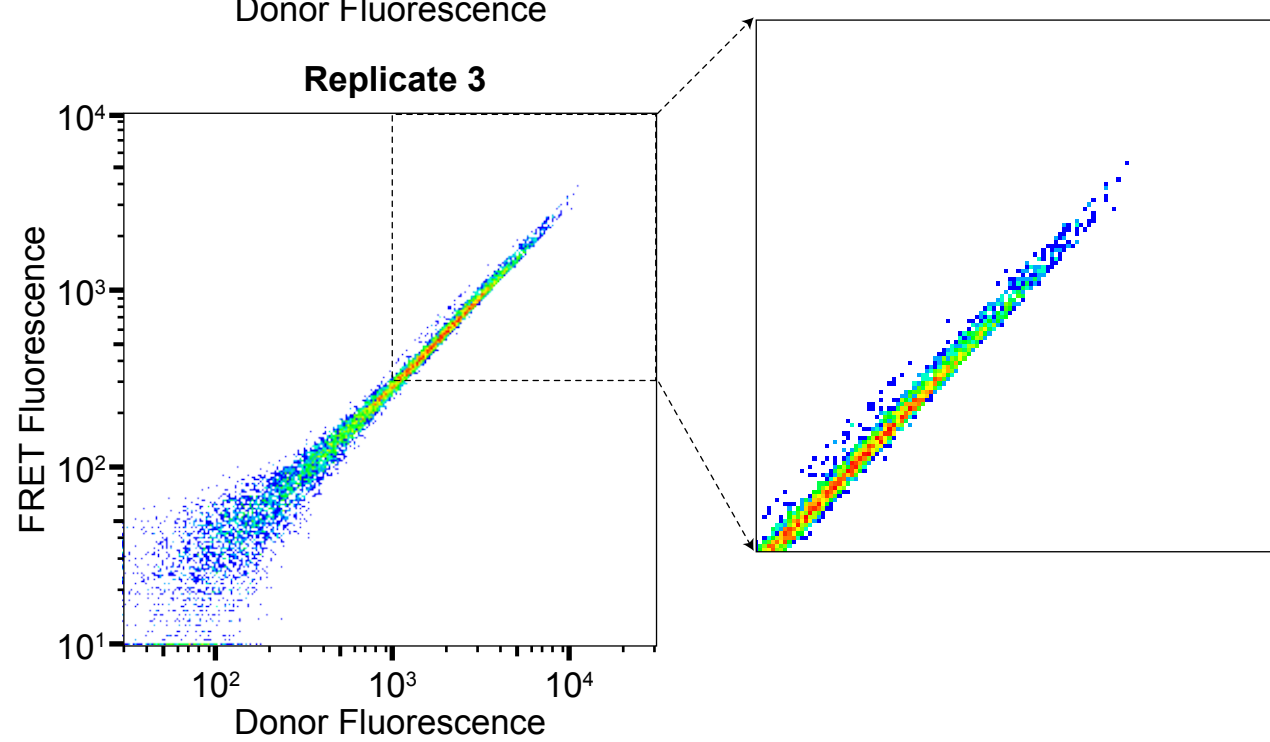

Supplement: mmc2.pdf [file mmc2.pdf]
